# Supplementary material for: Cationic iridium complexes with an alkyl-linked bulky group at the cyclometalating ligand: synthesis, characterization, and suppression of phosphorescence concentration-quenching
Source: Royal Society of Chemistry journal article supplement (doi:10.1039/d1nj02375f), 2021-01-01
Supplement: d1nj02375f1.pdf [file d1nj02375f1.pdf]

**Electronic Supplementary Information**  
**Cationic Iridium Complexes with an Alkyl-linked Bulky**  
**Group at the Cyclometalating Ligand: Synthesis,**  
**Characterizations, and Suppression of Phosphorescence**  
**Concentration-quenching**

*Yongjun Song,<sup>1</sup> Hao Ren,<sup>1</sup> Xianwen Meng and Lei He\**

College of Chemistry, Key Laboratory of Pesticide & Chemical Biology of Ministry of Education, Hubei International Scientific and Technological Cooperation Base of Pesticide and Green Synthesis, Central China Normal University, Wuhan 430079, P. R. China.

*E-mail:* [helei@mail.ccnu.edu.cn](mailto:helei@mail.ccnu.edu.cn)

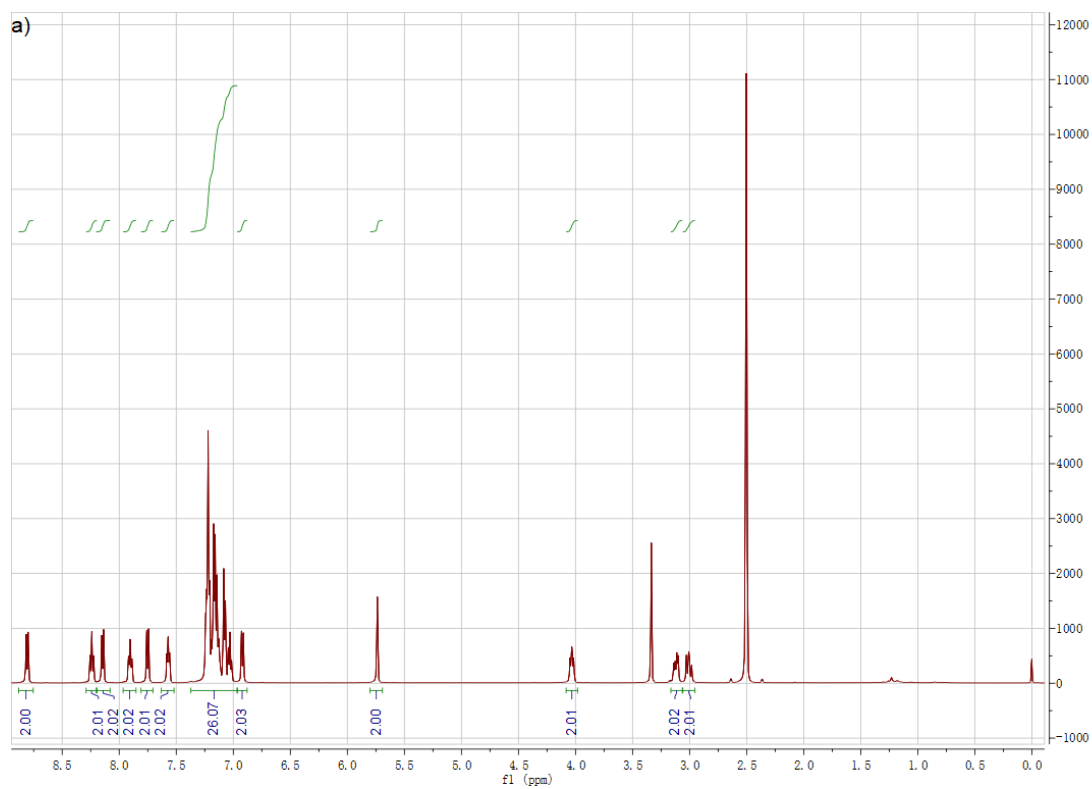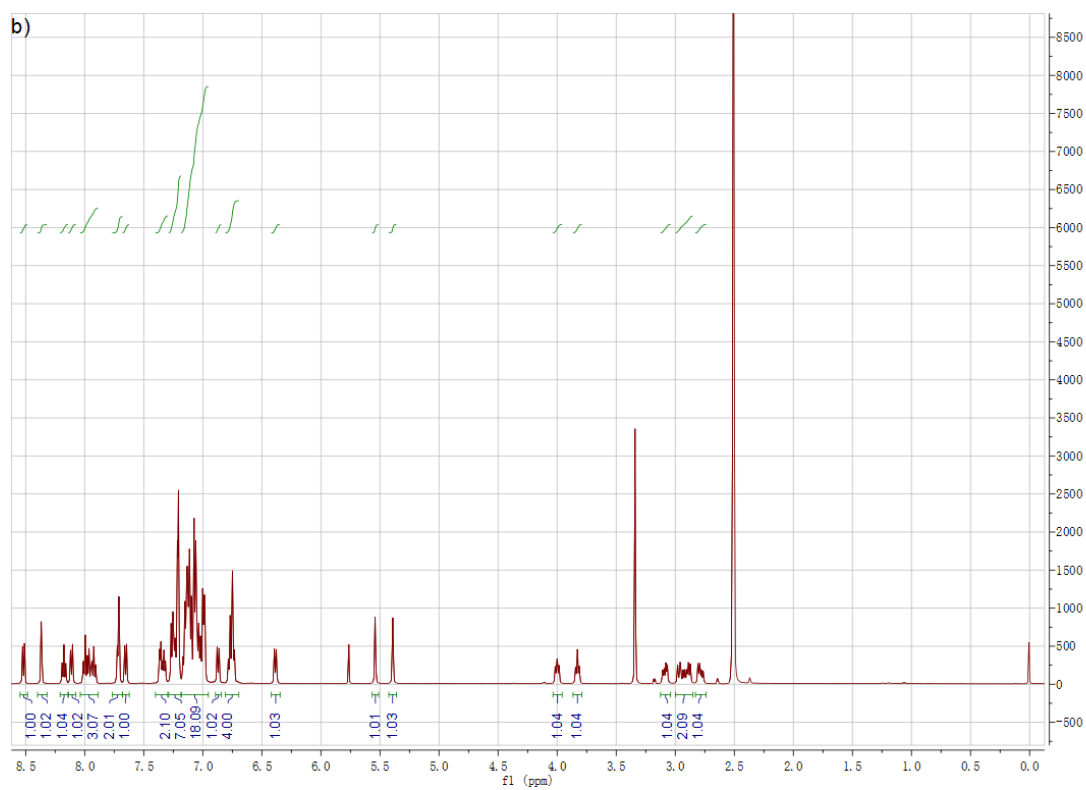

**Figure S1.**  $^1\text{H}$  NMR spectra of a) complex 1 and b) complex 2 in  $\text{DMSO-}d_6$ . The single peak at 5.76 in the spectrum of complex 2 arises from the  $\text{H}^1$  NMR signal of residual  $\text{CH}_2\text{Cl}_2$  solvent because complex 2 was recrystallized from  $\text{CH}_2\text{Cl}_2/\text{hexane}$  solution.

15 #19 RT: 0.16 AV: 1 NL: 4.40E5  
T: FTMS + c ESI Full ms [150.00-1500.00]

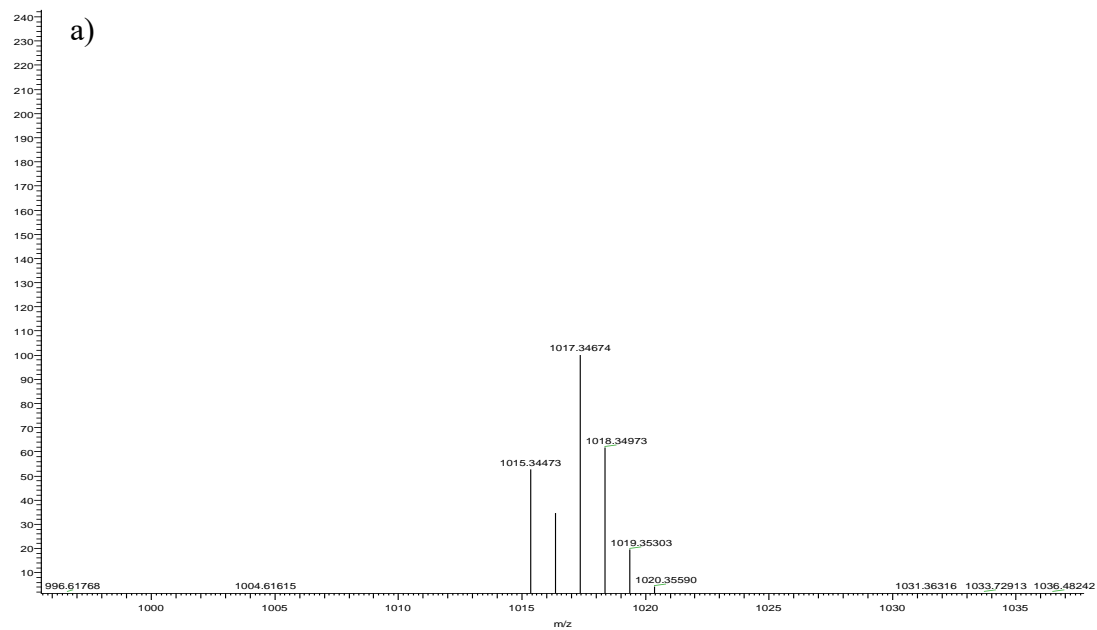

16 #14 RT: 0.12 AV: 1 NL: 6.21E5  
T: FTMS + c ESI Full ms [150.00-1500.00]

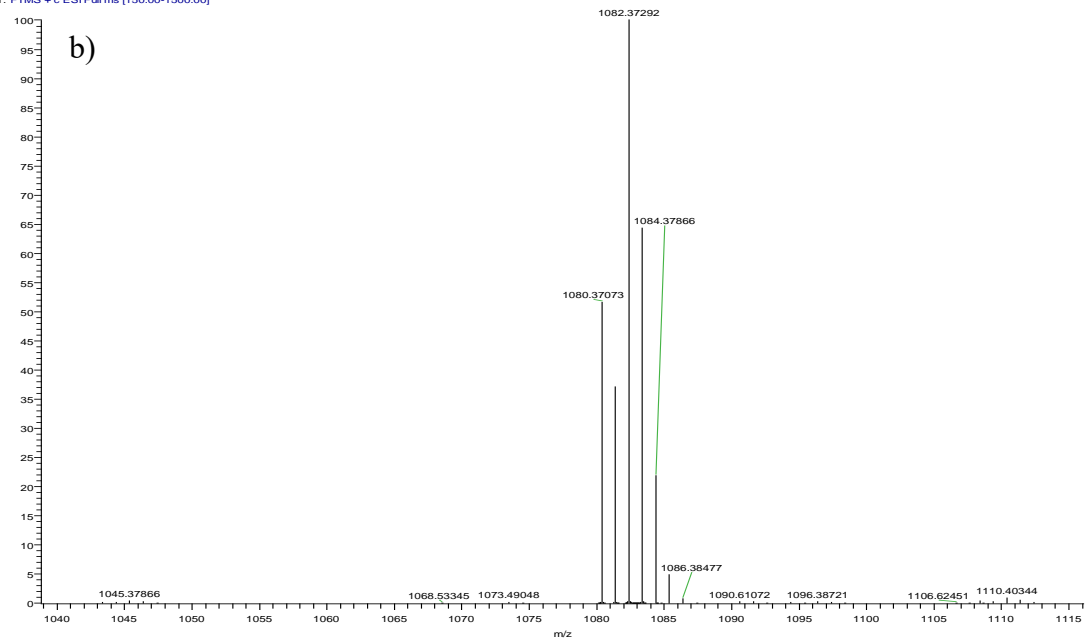

Figure S2. HRMS spectra of a) complex 1 and b) complex 2.

**Table S1.** Selected bond lengths and dihedral angles for complexes 1 and 2

| State | Bond length (Å)                               |                                                              |                                                              | Bite angles (°)             |                             |      |
|-------|-----------------------------------------------|--------------------------------------------------------------|--------------------------------------------------------------|-----------------------------|-----------------------------|------|
|       | Ir-C <sup>^</sup> N <sup>^</sup> <sup>a</sup> | Ir-N <sup>^</sup> C <sup>^</sup> N <sup>^</sup> <sup>b</sup> | Ir-N <sup>^</sup> N <sup>^</sup> N <sup>^</sup> <sup>c</sup> | Φ <sub>1</sub> <sup>d</sup> | Φ <sub>2</sub> <sup>e</sup> |      |
| 1     | S <sub>0</sub>                                | 2.023/2.023                                                  | 2.083/2.083                                                  | 2.211/2.211                 | 80.1/80.1                   | 74.9 |
|       | T <sub>1</sub>                                | 1.997/1.997                                                  | 2.082/2.082                                                  | 2.199/2.199                 | 80.9/80.9                   | 75.4 |
| 2     | crystal                                       | 2.000/2.013                                                  | 2.065/2.058                                                  | 2.187/2.145                 | 80.5/80.5                   | 74.9 |
|       | S <sub>0</sub>                                | 2.025/2.014                                                  | 2.080/2.084                                                  | 2.277/2.241                 | 80.3/80.0                   | 73.8 |
|       | T <sub>1</sub>                                | 1.986/2.010                                                  | 2.056/2.097                                                  | 2.264/2.314                 | 81.8/80.3                   | 72.9 |
|       | T <sub>3</sub>                                | 2.005/1.988                                                  | 2.083/2.082                                                  | 2.234/2.239                 | 80.9/81.0                   | 74.0 |

<sup>a</sup> The Ir-C bond length between iridium and the C<sup>^</sup>N ligand. <sup>b</sup> The Ir-N bond length between iridium and the C<sup>^</sup>N ligand. <sup>c</sup> The Ir-N bond length between iridium and the N<sup>^</sup>N ligand. <sup>d</sup> The ligand bite angles of C<sup>^</sup>N ligands. <sup>e</sup> The ligand bite angle of N<sup>^</sup>N ligand. <sup>f</sup> The dihedral angle between the phenyl and pyridine rings of C<sup>^</sup>N ligand. <sup>g</sup> The dihedral angle between the pyridine rings or between the pyridine and pyrazole rings of N<sup>^</sup>N ligand.

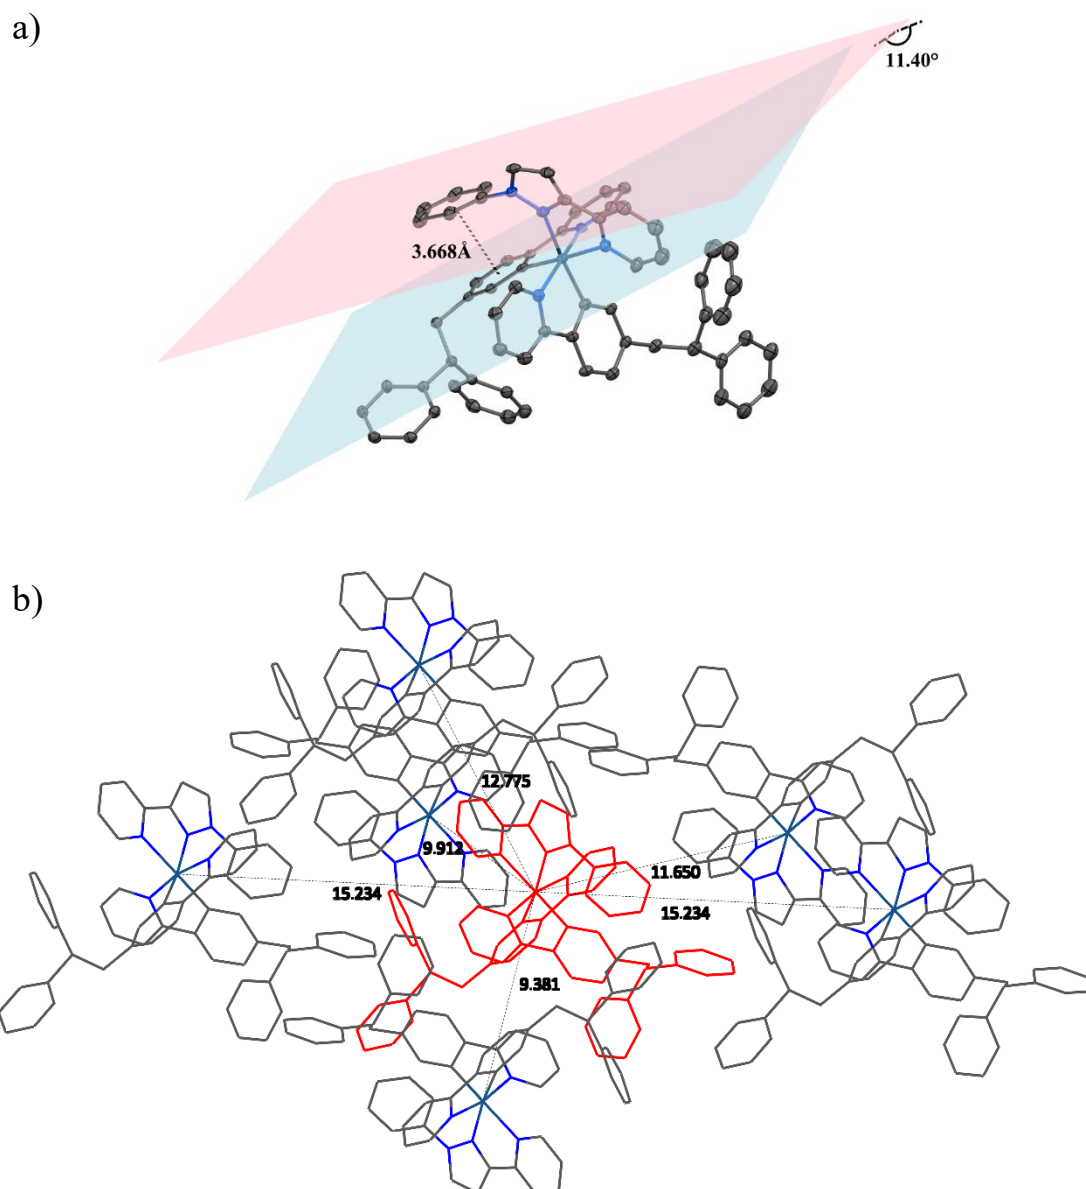

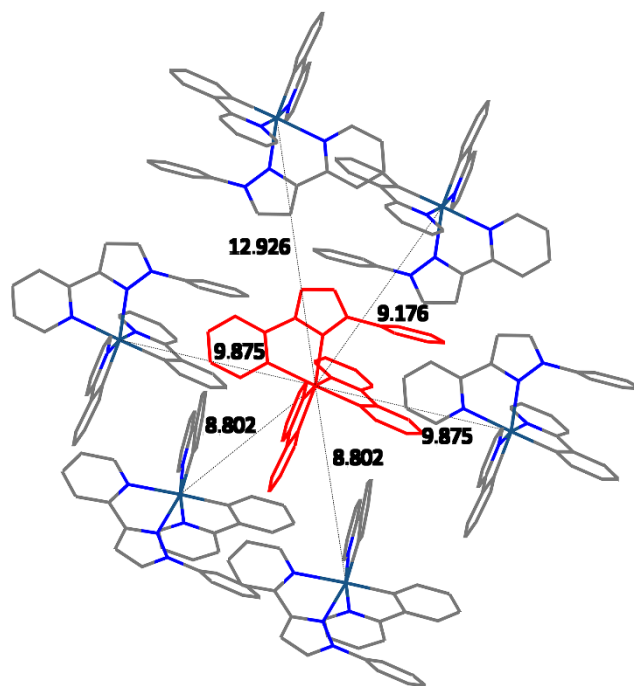

**Figure S4.** Ir-to-Ir distances (in Å) in the single crystal structure of [Ir(ppy)<sub>2</sub>(phzpy)]PF<sub>6</sub>; the central iridium complex was marked in red.

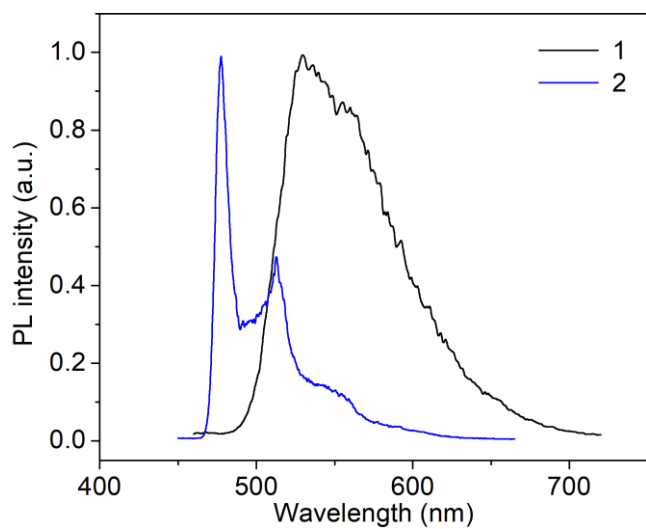

**Figure S5.** PL spectra of complexes 1 and 2 at 77 K in CH<sub>3</sub>CN glass.

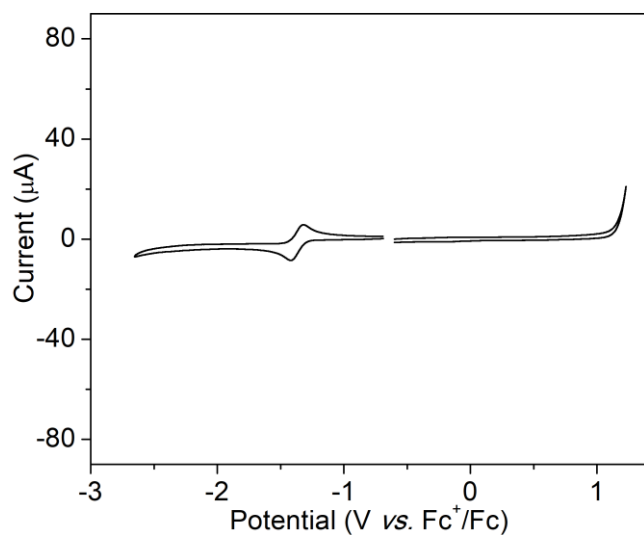

**Figure S6.** The blank test for cyclic voltammetry measurement in DMF solution. The only difference between the blank test and the sample test is that in the former, no sample was added in the solution.

**Table S2.** Distributions of HOMO-1, HOMO-2, LUMO+1 and LUMO+2 on complexes 1 and 2.

|   | HOMO-2 | HOMO-1 | LUMO+1 | LUMO+2 |
|---|--------|--------|--------|--------|
| 1 |        |        |        |        |
| 2 |        |        |        |        |

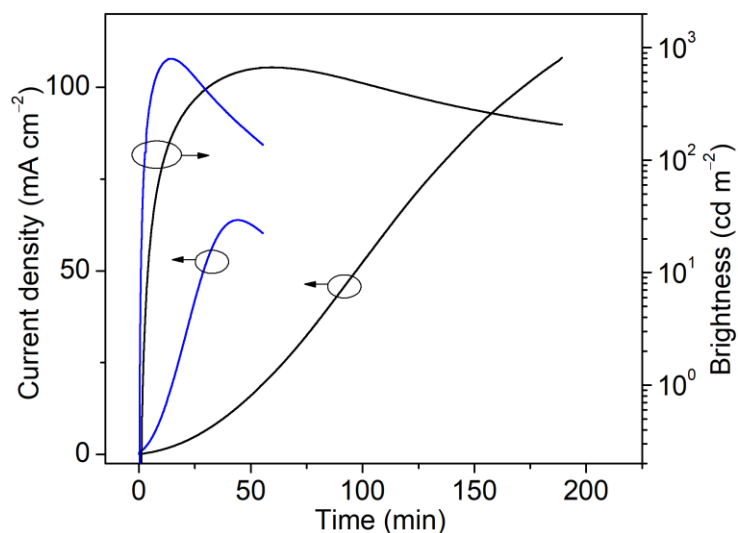

**Figure S7.** Time-dependent current-density and brightness curves of the LECs based on  $[\text{Ir}(\text{ppy})_2(\text{phzpy})]\text{PF}_6$  at 5.0 V. a) device C and b) device D.

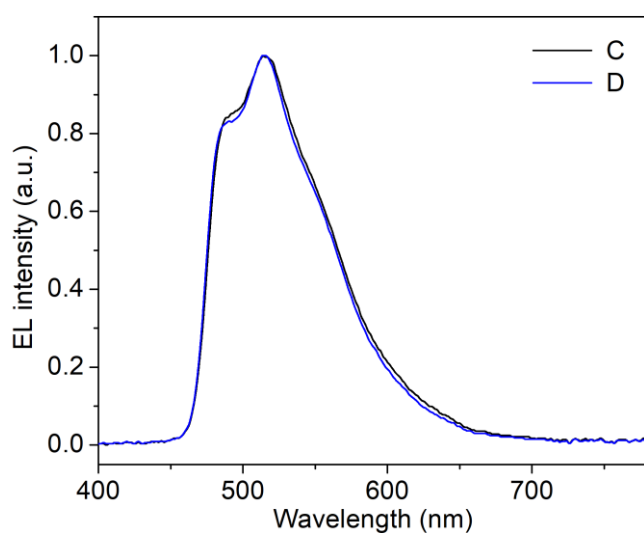

**Figure S8.** EL spectra of devices C and D.

**Table S3.** Cartesian coordinates of optimized geometries for complexes 1 and 2.

**Complex 1**

| $S_0$ |             |             |             | $T_1$ |             |             |             |
|-------|-------------|-------------|-------------|-------|-------------|-------------|-------------|
| Ir    | 0.00020824  | -2.22128583 | -0.00000254 | Ir    | -0.00004092 | -2.12046307 | -0.00000460 |
| N     | -0.85933579 | -2.10847568 | 1.89379256  | N     | -0.84413476 | -2.05550017 | 1.90172428  |
| C     | -1.92613324 | -2.82708151 | 2.29803458  | C     | -1.91284469 | -2.77282645 | 2.29197027  |
| H     | -2.35082804 | -3.50309951 | 1.56691995  | H     | -2.36198503 | -3.40677098 | 1.53824109  |
| C     | -2.46208342 | -2.71220331 | 3.57203258  | C     | -2.41340448 | -2.70019621 | 3.58605603  |
| H     | -3.32205241 | -3.31042153 | 3.84914732  | H     | -3.27818623 | -3.29298447 | 3.85919969  |
| C     | -1.86881165 | -1.81721166 | 4.46649808  | C     | -1.78207729 | -1.85859825 | 4.50298181  |



|   |             |             |             |   |             |             |             |
|---|-------------|-------------|-------------|---|-------------|-------------|-------------|
| H | -2.26042197 | -1.69955836 | 5.47166058  | H | -2.14817071 | -1.77753802 | 5.52090761  |
| C | -0.77000221 | -1.07555997 | 4.05386958  | C | -0.67348513 | -1.12236229 | 4.09930142  |
| H | -0.29939013 | -0.37483148 | 4.73271031  | H | -0.16961669 | -0.46599956 | 4.79794946  |
| C | -0.26521275 | -1.22578798 | 2.75414262  | C | -0.20697197 | -1.23092272 | 2.78478236  |
| C | 0.87785834  | -0.50885818 | 2.18955618  | C | 0.94976474  | -0.53126168 | 2.22283565  |
| C | 1.66384794  | 0.39929876  | 2.91604624  | C | 1.75858811  | 0.34888306  | 2.94653198  |
| H | 1.43716302  | 0.62158243  | 3.95483595  | H | 1.54974492  | 0.57233192  | 3.98762833  |
| C | 2.75499168  | 1.02191764  | 2.31899232  | C | 2.86175223  | 0.94729856  | 2.33888843  |
| H | 3.35063624  | 1.71485360  | 2.90370409  | H | 3.48029416  | 1.61483424  | 2.92898351  |
| C | 3.07835619  | 0.75723173  | 0.97808184  | C | 3.18226598  | 0.69471293  | 0.98973741  |
| C | 2.27292879  | -0.14036973 | 0.25802889  | C | 2.35522323  | -0.17097625 | 0.26807407  |
| H | 2.53059449  | -0.33505112 | -0.77996734 | H | 2.59648267  | -0.36800177 | -0.77207854 |
| C | 1.17730239  | -0.80139338 | 0.83100510  | C | 1.23605650  | -0.79998832 | 0.84715155  |
| N | 0.85972938  | -2.10827428 | -1.89380018 | N | 0.84405356  | -2.05550787 | -1.90173343 |
| C | -1.17708269 | -0.80151986 | -0.83094268 | C | -1.23611650 | -0.79996466 | -0.84715617 |
| C | 1.92662133  | -2.82671713 | -2.29808240 | C | 1.91275190  | -2.77285014 | -2.29198188 |
| C | 0.26547908  | -1.22562944 | -2.75410732 | C | 0.20690327  | -1.23091812 | -2.78478910 |
| C | -0.87768960 | -0.50888394 | -2.18948336 | C | -0.94982170 | -0.53123961 | -2.22283980 |
| C | -2.27279984 | -0.14067924 | -0.25793114 | C | -2.35527046 | -0.17093306 | -0.26807534 |
| H | 2.35140998  | -3.50271509 | -1.56700365 | H | 2.36188251  | -3.40680378 | -1.53825460 |
| C | 2.46254782  | -2.71170767 | -3.57207862 | C | 2.41331207  | -2.70022459 | -3.58606773 |
| C | 0.77023990  | -1.07527372 | -4.05383061 | C | 0.67341755  | -1.12236164 | -4.09930810 |
| C | -1.66381638 | 0.39918989  | -2.91592852 | C | -1.75863088 | 0.34892081  | -2.94653310 |
| C | -3.07836611 | 0.75683225  | -0.97794081 | C | -3.18229938 | 0.69477194  | -0.98973551 |
| H | -2.53043155 | -0.33544101 | 0.78005860  | H | -2.59653058 | -0.36795503 | 0.77207778  |
| H | 3.32259561  | -3.30979716 | -3.84922664 | H | 3.27808420  | -3.29302595 | -3.85921342 |
| C | 1.86914855  | -1.81675598 | -4.46649936 | C | 1.78199774  | -1.85861423 | -4.50299100 |
| H | 0.29952764  | -0.37457934 | -4.73263700 | H | 0.16955930  | -0.46598895 | -4.79795413 |
| H | -1.43717038 | 0.62155295  | -3.95470980 | H | -1.54978498 | 0.57236851  | -3.98762915 |
| C | -2.75504923 | 1.02162352  | -2.31884136 | C | -2.86178339 | 0.94735469  | -2.33888661 |
| H | 2.26073674  | -1.69900344 | -5.47165889 | H | 2.14809187  | -1.77755721 | -5.52091682 |
| H | -3.35079659 | 1.71449922  | -2.90351918 | H | -3.48031387 | 1.61490302  | -2.92897938 |
| C | -4.30491397 | 1.34553499  | -0.30074979 | C | -4.41953853 | 1.27276996  | -0.32762330 |
| H | -5.13590076 | 0.63652718  | -0.41775539 | H | -5.25434503 | 0.58071814  | -0.50133571 |
| H | -4.12774706 | 1.39795893  | 0.77959445  | H | -4.27341958 | 1.27912012  | 0.75773102  |
| C | -4.81450912 | 2.71543391  | -0.81177029 | C | -4.88787499 | 2.67102792  | -0.80304634 |
| H | -5.06684056 | 2.59626435  | -1.87173194 | H | -5.13584230 | 2.58906657  | -1.86735165 |
| C | -6.12713450 | 3.06408727  | -0.10330423 | C | -6.19745671 | 3.03197800  | -0.09455788 |
| C | -7.35217904 | 2.83515783  | -0.74495941 | C | -7.42196487 | 2.83140762  | -0.74659594 |
| C | -6.14445029 | 3.57518400  | 1.20284282  | C | -6.21342008 | 3.52468955  | 1.21837118  |
| C | -8.56293764 | 3.10666874  | -0.10261259 | C | -8.63171550 | 3.11324882  | -0.10716460 |
| H | -7.35816625 | 2.44145152  | -1.75870990 | H | -7.42838554 | 2.45192213  | -1.76570056 |
| C | -7.35196133 | 3.84645994  | 1.84875979  | C | -7.42030849 | 3.80644874  | 1.86111051  |
| H | -5.20697610 | 3.77378540  | 1.71467840  | H | -5.27632956 | 3.70090955  | 1.73868927  |

|   |             |             |             |   |             |             |             |
|---|-------------|-------------|-------------|---|-------------|-------------|-------------|
| C | -8.56686467 | 3.61355361  | 1.19827498  | C | -8.63478758 | 3.60208159  | 1.20065069  |
| H | -9.50056088 | 2.92531551  | -0.62070421 | H | -9.56908970 | 2.95421273  | -0.63283825 |
| H | -7.34367987 | 4.24395294  | 2.85994086  | H | -7.41146171 | 4.18977427  | 2.87767771  |
| H | -9.50611835 | 3.82871418  | 1.69958455  | H | -9.57331804 | 3.82532123  | 1.69970061  |
| C | -3.80127339 | 3.85486255  | -0.72436427 | C | -3.84043384 | 3.77498340  | -0.67852325 |
| C | -3.92688221 | 4.93903575  | -1.60780191 | C | -3.89852418 | 4.86240043  | -1.56474140 |
| C | -2.76877027 | 3.88963759  | 0.22255896  | C | -2.84024318 | 3.77381831  | 0.30384230  |
| C | -3.05551529 | 6.02609398  | -1.54642002 | C | -2.99310155 | 5.91896596  | -1.47178442 |
| H | -4.72072937 | 4.92840302  | -2.35108456 | H | -4.66620346 | 4.87867935  | -2.33476948 |
| C | -1.89340564 | 4.97824089  | 0.28941725  | C | -1.93067114 | 4.83142721  | 0.40143741  |
| H | -2.63255222 | 3.06145413  | 0.91068209  | H | -2.75748431 | 2.94397980  | 0.99875748  |
| C | -2.03353404 | 6.05062637  | -0.59288362 | C | -2.00429086 | 5.90786673  | -0.48393454 |
| H | -3.17223471 | 6.85177797  | -2.24287052 | H | -3.05753084 | 6.74833678  | -2.17050092 |
| H | -1.09601297 | 4.98210880  | 1.02673995  | H | -1.16025916 | 4.80919837  | 1.16665569  |
| H | -1.35312180 | 6.89577604  | -0.54112261 | H | -1.29848553 | 6.72978610  | -0.40765891 |
| C | 4.30482399  | 1.34615483  | 0.30093980  | C | 4.41951987  | 1.27268597  | 0.32763087  |
| H | 5.13597180  | 0.63735996  | 0.41809219  | H | 5.25430722  | 0.58061098  | 0.50134318  |
| H | 4.12774342  | 1.39843204  | -0.77942497 | H | 4.27340671  | 1.27904659  | -0.75772437 |
| C | 4.81403797  | 2.71623023  | 0.81187591  | C | 4.88789412  | 2.67092757  | 0.80306569  |
| H | 5.06632572  | 2.59721771  | 1.87186509  | H | 5.13577314  | 2.58897110  | 1.86739210  |
| C | 6.12662697  | 3.06515242  | 0.10347424  | C | 6.19755312  | 3.03179104  | 0.09467654  |
| C | 7.35168235  | 2.83649040  | 0.74520462  | C | 7.42199636  | 2.83117462  | 0.74682218  |
| C | 6.14391191  | 3.57622426  | -1.20268257 | C | 6.21365106  | 3.52446582  | -1.21826473 |
| C | 8.56242154  | 3.10823945  | 0.10292276  | C | 8.63181493  | 3.11293522  | 0.10748391  |
| H | 7.35769216  | 2.44280518  | 1.75896318  | H | 7.42831203  | 2.45171682  | 1.76593780  |
| C | 7.35140432  | 3.84773869  | -1.84853487 | C | 7.42060774  | 3.80614415  | -1.86091127 |
| H | 5.20642611  | 3.77461731  | -1.71457699 | H | 5.27661284  | 3.70071983  | -1.73866547 |
| C | 8.56631824  | 3.61509887  | -1.19797507 | C | 8.63502116  | 3.60173176  | -1.20034460 |
| H | 9.50005245  | 2.92709268  | 0.62107268  | H | 9.56913712  | 2.95386472  | 0.63323989  |
| H | 7.34309857  | 4.24520952  | -2.85972446 | H | 7.41186568  | 4.18944206  | -2.87748979 |
| H | 9.50555610  | 3.83044578  | -1.69923430 | H | 9.57360480  | 3.82490872  | -1.69932259 |
| C | 3.80051426  | 3.85538972  | 0.72430589  | C | 3.84052636  | 3.77494120  | 0.67843757  |
| C | 3.92574043  | 4.93963346  | 1.60771106  | C | 3.89860474  | 4.86236856  | 1.56464381  |
| C | 2.76811180  | 3.88985708  | -0.22273931 | C | 2.84042082  | 3.77382040  | -0.30401453 |
| C | 3.05410117  | 6.02646525  | 1.54618054  | C | 2.99325141  | 5.91898522  | 1.47159365  |
| H | 4.71950429  | 4.92923488  | 2.35108572  | H | 4.66621949  | 4.87861466  | 2.33473694  |
| C | 1.89247409  | 4.97823149  | -0.28974533 | C | 1.93091845  | 4.83148066  | -0.40170324 |
| H | 2.63219102  | 3.06161132  | -0.91084618 | H | 2.75767441  | 2.94397634  | -0.99892456 |
| C | 2.03222440  | 6.05069231  | 0.59252460  | C | 2.00452420  | 5.90792843  | 0.48365977  |
| H | 3.17052687  | 6.85220936  | 2.24260887  | H | 3.05766911  | 6.74836277  | 2.17030326  |
| H | 1.09516676  | 4.98186411  | -1.02716163 | H | 1.16057078  | 4.80928538  | -1.16698722 |
| H | 1.35160105  | 6.89566476  | 0.54064701  | H | 1.29877257  | 6.72988718  | 0.40731216  |
| C | -0.62334145 | -5.19422568 | -0.40094315 | C | -0.61483272 | -5.10302922 | -0.35905942 |
| C | -1.24369650 | -6.36736372 | -0.84418945 | C | -1.30292424 | -6.28123652 | -0.77231493 |

|   |             |             |             |   |             |             |             |
|---|-------------|-------------|-------------|---|-------------|-------------|-------------|
| C | -2.41610780 | -6.28707668 | -1.59005481 | C | -2.48311113 | -6.20019975 | -1.46892609 |
| H | -0.81791821 | -7.33595907 | -0.61717147 | H | -0.88430658 | -7.25185629 | -0.53408349 |
| C | -2.28222426 | -3.90393399 | -1.41697506 | C | -2.32913164 | -3.80613847 | -1.36226627 |
| C | -2.94839716 | -5.03280667 | -1.88198184 | C | -3.02134906 | -4.92263163 | -1.78006654 |
| H | -2.90272280 | -7.19207530 | -1.93746253 | H | -2.99726720 | -7.10466516 | -1.77864259 |
| H | -2.65113509 | -2.90461320 | -1.61573746 | H | -2.70532496 | -2.81133344 | -1.57063113 |
| H | -3.85893895 | -4.92164964 | -2.45920537 | H | -3.94964247 | -4.81101078 | -2.32765147 |
| C | 0.62419157  | -5.19415721 | 0.40076091  | C | 0.61470007  | -5.10304078 | 0.35904131  |
| C | 1.24473098  | -6.36723063 | 0.84392044  | C | 1.30277103  | -6.28126103 | 0.77229412  |
| C | 2.28286533  | -3.90368022 | 1.41689874  | C | 2.32902131  | -3.80618224 | 1.36225160  |
| C | 2.41712614  | -6.28681469 | 1.58979717  | C | 2.48295920  | -6.20024648 | 1.46890569  |
| H | 0.81910785  | -7.33587630 | 0.61682618  | H | 0.88413649  | -7.25187296 | 0.53406041  |
| C | 2.94921377  | -5.03248246 | 1.88182478  | C | 3.02121930  | -4.92268841 | 1.78004926  |
| H | 2.65161784  | -2.90431606 | 1.61573669  | H | 2.70523181  | -2.81138423 | 1.57061894  |
| H | 2.90388385  | -7.19176266 | 1.93713673  | H | 2.99709947  | -7.10472152 | 1.77862019  |
| H | 3.85973441  | -4.92122490 | 2.45906233  | H | 3.94951460  | -4.81108501 | 2.32763454  |
| N | -1.15054082 | -3.97711466 | -0.69506594 | N | -1.16667020 | -3.86105092 | -0.66811752 |
| N | 1.15119909  | -3.97698516 | 0.69497530  | N | 1.16655903  | -3.86107285 | 0.66810258  |

## Complex 2

| S <sub>0</sub> |             |             | T <sub>1</sub> |    |             |             |             |
|----------------|-------------|-------------|----------------|----|-------------|-------------|-------------|
| Ir             | -1.37274450 | -1.53927057 | 0.17645206     | Ir | -1.11062156 | -1.69397933 | 0.18048550  |
| N              | -1.87502506 | -0.65741176 | 1.99639272     | N  | -1.72867932 | -0.90692674 | 2.02294067  |
| C              | -3.12603936 | -0.33833357 | 2.38337687     | C  | -3.00808524 | -0.76557496 | 2.42037112  |
| H              | -3.91401291 | -0.56297742 | 1.67702768     | H  | -3.76447285 | -1.08221239 | 1.71403097  |
| C              | -3.39996812 | 0.24688899  | 3.61098107     | C  | -3.34829938 | -0.23781560 | 3.65769177  |
| H              | -4.42314950 | 0.48634112  | 3.87559343     | H  | -4.39201115 | -0.14086966 | 3.93218993  |
| C              | -2.33508055 | 0.51215503  | 4.47569149     | C  | -2.32157089 | 0.16023077  | 4.51752081  |
| H              | -2.51022324 | 0.96929219  | 5.44415014     | H  | -2.54901573 | 0.58027132  | 5.49184933  |
| C              | -1.04455703 | 0.18536048  | 4.08041152     | C  | -1.00138492 | 0.01476878  | 4.11108638  |
| H              | -0.20593850 | 0.38696233  | 4.73528466     | H  | -0.19305681 | 0.32115625  | 4.76344315  |
| C              | -0.81948677 | -0.40368534 | 2.82841073     | C  | -0.71018368 | -0.52701460 | 2.85184790  |
| C              | 0.48183290  | -0.79298836 | 2.28620100     | C  | 0.62854472  | -0.74638860 | 2.30238340  |
| C              | 1.68861356  | -0.67613902 | 2.99580390     | C  | 1.81469892  | -0.47948198 | 3.00526234  |
| H              | 1.70090218  | -0.27419057 | 4.00444931     | H  | 1.78211382  | -0.08076894 | 4.01459018  |
| C              | 2.88352517  | -1.08995867 | 2.42045687     | C  | 3.04918873  | -0.73621195 | 2.42139936  |
| H              | 3.80574565  | -1.01040106 | 2.98925193     | H  | 3.95601957  | -0.53894297 | 2.98617916  |
| C              | 2.90180935  | -1.62206298 | 1.11953241     | C  | 3.13196517  | -1.25901465 | 1.11887058  |
| C              | 1.69068136  | -1.73285434 | 0.42065100     | C  | 1.94264028  | -1.52598867 | 0.42641586  |
| H              | 1.71435823  | -2.15611907 | -0.57923103    | H  | 2.00847088  | -1.94007890 | -0.57477934 |
| C              | 0.46429374  | -1.33785122 | 0.97602851     | C  | 0.68228162  | -1.28548724 | 0.99108476  |
| N              | -0.69577455 | -2.27181697 | -1.64912252    | N  | -0.36817157 | -2.34431651 | -1.62332404 |
| C              | -1.07409794 | 0.20335683  | -0.81134435    | C  | -1.10639301 | 0.04908955  | -0.77061699 |

|   |             |             |             |   |             |             |             |
|---|-------------|-------------|-------------|---|-------------|-------------|-------------|
| C | -0.58711824 | -3.57933477 | -1.95968199 | C | -0.10198233 | -3.61253858 | -1.97256444 |
| C | -0.31996938 | -1.31998892 | -2.55872956 | C | -0.10123656 | -1.30298496 | -2.55253097 |
| C | -0.51782126 | 0.05603336  | -2.10912166 | C | -0.49445317 | -0.02758105 | -2.12079471 |
| C | -1.32626922 | 1.50842587  | -0.36097873 | C | -1.54817193 | 1.29590580  | -0.31407898 |
| H | -0.90105312 | -4.27738800 | -1.19457801 | H | -0.33593157 | -4.36895660 | -1.23243884 |
| C | -0.09566186 | -4.01761015 | -3.18032422 | C | 0.45318856  | -3.96481913 | -3.19546181 |
| C | 0.18608218  | -1.71462305 | -3.80631495 | C | 0.49397180  | -1.63566054 | -3.80898315 |
| C | -0.23146724 | 1.18026695  | -2.90197221 | C | -0.35625796 | 1.17984672  | -2.88313548 |
| C | -1.06070683 | 2.63714806  | -1.14823876 | C | -1.45355641 | 2.45774892  | -1.08554496 |
| H | -1.75003282 | 1.66292262  | 0.62739618  | H | -1.99296334 | 1.37119924  | 0.67416429  |
| H | -0.02686834 | -5.08003163 | -3.38214004 | H | 0.64215668  | -5.00930025 | -3.41278205 |
| C | 0.30159306  | -3.06224716 | -4.11991189 | C | 0.77052405  | -2.93831195 | -4.13453863 |
| H | 0.48536315  | -0.96125373 | -4.52482359 | H | 0.71971305  | -0.83666947 | -4.50658888 |
| H | 0.18838992  | 1.06545524  | -3.89718763 | H | 0.09783213  | 1.15756149  | -3.86841129 |
| C | -0.50251893 | 2.45637284  | -2.42657465 | C | -0.82933774 | 2.36255976  | -2.38139025 |
| H | 0.69428158  | -3.36613172 | -5.08487107 | H | 1.22077723  | -3.18779006 | -5.08927489 |
| H | -0.29400930 | 3.32036090  | -3.05235822 | H | -0.74241583 | 3.26487025  | -2.98254355 |
| C | -1.37671639 | 4.03346646  | -0.65402388 | C | -1.98611531 | 3.78587612  | -0.61430147 |
| H | -1.90099880 | 4.58011948  | -1.44720277 | H | -2.59514740 | 4.23368161  | -1.41104537 |
| H | -2.06264061 | 3.97167425  | 0.19702011  | H | -2.64956916 | 3.62713979  | 0.24185274  |
| C | -0.12074133 | 4.86100860  | -0.25477788 | C | -0.87957601 | 4.81818010  | -0.23390030 |
| H | 0.60072770  | 4.75439364  | -1.07334689 | H | -0.15498683 | 4.82404709  | -1.05674586 |
| C | -0.40379901 | 6.35752171  | -0.11598192 | C | -1.41055049 | 6.24669914  | -0.11474457 |
| C | 0.64965404  | 7.26578074  | -0.30984782 | C | -0.54482367 | 7.31739405  | -0.38988896 |
| C | -1.66493980 | 6.87070786  | 0.21766765  | C | -2.72446321 | 6.54327076  | 0.27461153  |
| C | 0.45361885  | 8.63964802  | -0.17315126 | C | -0.97291304 | 8.64013661  | -0.27759113 |
| H | 1.63528728  | 6.88727222  | -0.57032204 | H | 0.47736125  | 7.10782446  | -0.69619071 |
| C | -1.86562658 | 8.24798129  | 0.35735864  | C | -3.15750331 | 7.86802118  | 0.38972982  |
| H | -2.50556049 | 6.20046524  | 0.36732938  | H | -3.42579332 | 5.74234824  | 0.48625974  |
| C | -0.80879112 | 9.13770960  | 0.16316912  | C | -2.28480584 | 8.92139914  | 0.11482800  |
| H | 1.28427722  | 9.32159890  | -0.33267187 | H | -0.28447432 | 9.45062459  | -0.50035488 |
| H | -2.85239644 | 8.62220671  | 0.61574673  | H | -4.18089287 | 8.07295904  | 0.69166679  |
| H | -0.96580768 | 10.20727101 | 0.26870075  | H | -2.62267108 | 9.95007774  | 0.20084048  |
| C | 0.55149418  | 4.30385939  | 1.00063512  | C | -0.11664176 | 4.39120779  | 1.01987709  |
| C | 1.77429735  | 3.62623223  | 0.91148692  | C | 1.19877104  | 3.91864049  | 0.92195364  |
| C | -0.03952745 | 4.44907312  | 2.26535115  | C | -0.70994164 | 4.45145537  | 2.29031321  |
| C | 2.39213336  | 3.10475706  | 2.05168819  | C | 1.90542773  | 3.51602418  | 2.05878212  |
| H | 2.25034646  | 3.50233622  | -0.05778630 | H | 1.67847394  | 3.86391963  | -0.05190184 |
| C | 0.57301431  | 3.92877992  | 3.40603150  | C | -0.00850402 | 4.05006067  | 3.42793073  |
| H | -0.98026598 | 4.98464255  | 2.36117824  | H | -1.72398060 | 4.82796968  | 2.39398656  |
| C | 1.79370477  | 3.25455998  | 3.30382682  | C | 1.30417577  | 3.58125083  | 3.31685559  |
| H | 3.33850744  | 2.58072196  | 1.95450640  | H | 2.92380728  | 3.15243887  | 1.95497172  |
| H | 0.10042685  | 4.05521007  | 4.37625704  | H | -0.48484537 | 4.10898119  | 4.40274052  |
| H | 2.27344848  | 2.85385895  | 4.19217780  | H | 1.85220929  | 3.27410878  | 4.20302418  |

|   |             |             |             |   |             |             |             |
|---|-------------|-------------|-------------|---|-------------|-------------|-------------|
| C | 4.20000793  | -2.10510927 | 0.50322685  | C | 4.47826860  | -1.55844558 | 0.49029166  |
| H | 4.61816966  | -2.90162142 | 1.13129619  | H | 5.00094368  | -2.30444310 | 1.10184967  |
| H | 4.00047581  | -2.56493149 | -0.47012977 | H | 4.33345013  | -2.02286474 | -0.49040119 |
| C | 5.30824599  | -1.02269969 | 0.36023635  | C | 5.43238415  | -0.33615744 | 0.36341131  |
| H | 5.48441809  | -0.61670022 | 1.36257627  | H | 5.57204143  | 0.06112698  | 1.37502949  |
| C | 6.62179865  | -1.67749952 | -0.07566554 | C | 6.81266802  | -0.80098397 | -0.10800411 |
| C | 7.64301152  | -1.88960872 | 0.86080576  | C | 7.85173596  | -0.95404148 | 0.82062791  |
| C | 6.82696485  | -2.11221238 | -1.39369455 | C | 7.06728948  | -1.11915622 | -1.45027485 |
| C | 8.83603565  | -2.51860922 | 0.49537447  | C | 9.11057249  | -1.41196939 | 0.42382309  |
| H | 7.50305784  | -1.55827888 | 1.88703083  | H | 7.67354674  | -0.71076816 | 1.86546791  |
| C | 8.01623658  | -2.74313008 | -1.76249884 | C | 8.32318458  | -1.57892946 | -1.85063362 |
| H | 6.05692321  | -1.94692950 | -2.14181319 | H | 6.28289714  | -0.99591592 | -2.19147485 |
| C | 9.02665810  | -2.94882346 | -0.81900628 | C | 9.35077520  | -1.72669519 | -0.91507066 |
| H | 9.61525534  | -2.66899454 | 1.23744568  | H | 9.90218646  | -1.51861091 | 1.16031461  |
| H | 8.15537400  | -3.07087501 | -2.78903552 | H | 8.50033153  | -1.81788213 | -2.89564408 |
| H | 9.95350157  | -3.43642076 | -1.10710329 | H | 10.32902120 | -2.08029429 | -1.22779045 |
| C | 4.93742691  | 0.16214101  | -0.52915272 | C | 4.89074695  | 0.81471507  | -0.48144190 |
| C | 5.46145640  | 1.42801757  | -0.22215208 | C | 5.26017698  | 2.12761797  | -0.14797368 |
| C | 4.12957454  | 0.04209868  | -1.66892122 | C | 4.06915986  | 0.62505828  | -1.60182930 |
| C | 5.19461054  | 2.53693372  | -1.02673047 | C | 4.83019615  | 3.21630290  | -0.90795047 |
| H | 6.09204317  | 1.54275002  | 0.65640357  | H | 5.89743395  | 2.29579006  | 0.71706804  |
| C | 3.85936369  | 1.14951297  | -2.47821444 | C | 3.63573701  | 1.71232020  | -2.36652331 |
| H | 3.69812608  | -0.91777284 | -1.93411525 | H | 3.75226468  | -0.37338017 | -1.88555122 |
| C | 4.39107204  | 2.40102572  | -2.16239623 | C | 4.01453481  | 3.01164311  | -2.02466605 |
| H | 5.61355089  | 3.50509357  | -0.76703987 | H | 5.13150491  | 4.22204150  | -0.62873464 |
| H | 3.22799671  | 1.03159760  | -3.35418140 | H | 2.99621634  | 1.54083227  | -3.22752771 |
| H | 4.18152067  | 3.26080280  | -2.79211932 | H | 3.67791647  | 3.85548575  | -2.61994927 |
| C | -2.99502154 | -4.04470143 | 1.01020394  | C | -2.44150465 | -4.38332010 | 1.04760295  |
| C | -3.34587299 | -5.26392848 | 1.59828775  | C | -2.64958747 | -5.62604878 | 1.65415291  |
| C | -0.82343952 | -4.22324652 | 1.82818702  | C | -0.24447978 | -4.32918474 | 1.81055409  |
| C | -2.38942360 | -5.97024001 | 2.32063807  | C | -1.60822795 | -6.22269894 | 2.35740484  |
| H | -4.35223218 | -5.64948276 | 1.48664718  | H | -3.61241094 | -6.11537290 | 1.56879248  |
| C | -1.10363068 | -5.44172391 | 2.43765184  | C | -0.38129808 | -5.56404450 | 2.43598050  |
| H | 0.15970278  | -3.77170292 | 1.88981099  | H | 0.68947383  | -3.78126083 | 1.84346620  |
| H | -2.64396450 | -6.91804520 | 2.78298208  | H | -1.75202119 | -7.18705743 | 2.83301949  |
| H | -0.32648063 | -5.95774222 | 2.98941947  | H | 0.45923342  | -5.99189743 | 2.96986037  |
| N | -1.74276665 | -3.53418629 | 1.12848328  | N | -1.24739466 | -3.74436268 | 1.13140162  |
| C | -5.31754718 | -3.44164699 | -0.00506779 | C | -4.84295038 | -4.04179482 | 0.09668306  |
| C | -5.69963046 | -2.35864581 | -0.76582916 | C | -5.35041020 | -3.03425985 | -0.69435111 |
| H | -5.94528650 | -4.25369859 | 0.32614081  | H | -5.37918437 | -4.89521553 | 0.48082208  |
| H | -6.64950812 | -2.09006892 | -1.20193301 | H | -6.33261270 | -2.88141320 | -1.11449353 |
| N | -3.51410178 | -2.10747062 | -0.34916115 | N | -3.18947173 | -2.55690377 | -0.35839992 |
| N | -4.60373210 | -1.57392856 | -0.95805199 | N | -4.34152512 | -2.15669173 | -0.95226949 |
| C | -3.94241788 | -3.24534628 | 0.23498813  | C | -3.48656610 | -3.70451734 | 0.28251840  |

|                      |             |             |             |   |             |             |             |
|----------------------|-------------|-------------|-------------|---|-------------|-------------|-------------|
| C                    | -4.57941128 | -0.37353188 | -1.74283043 | C | -4.43630397 | -1.02053805 | -1.81984632 |
| C                    | -3.83636125 | -0.32917041 | -2.92313621 | C | -3.65307726 | -0.96430491 | -2.97413397 |
| C                    | -5.37620775 | 0.70258129  | -1.34489212 | C | -5.37864493 | -0.03059694 | -1.53084775 |
| C                    | -3.88540994 | 0.82114135  | -3.71028259 | C | -3.81288953 | 0.11182138  | -3.84689763 |
| H                    | -3.24179562 | -1.18541018 | -3.21998157 | H | -2.94081097 | -1.75366968 | -3.18367139 |
| C                    | -5.42191633 | 1.84582646  | -2.14406469 | C | -5.53445561 | 1.03627493  | -2.41686752 |
| H                    | -5.94717883 | 0.64264657  | -0.42408726 | H | -5.97452830 | -0.09631827 | -0.62638028 |
| C                    | -4.67661171 | 1.90614114  | -3.32386958 | C | -4.75247896 | 1.10886671  | -3.57236940 |
| H                    | -3.30937538 | 0.86554588  | -4.62867278 | H | -3.20788297 | 0.16465359  | -4.74605982 |
| H                    | -6.03756501 | 2.68691792  | -1.84174584 | H | -6.26354650 | 1.81040059  | -2.20014484 |
| H                    | -4.71473615 | 2.79646552  | -3.94381679 | H | -4.87670746 | 1.94031144  | -4.25913440 |
| <b>T<sub>3</sub></b> |             |             |             |   |             |             |             |
| Ir                   | 0.89359700  | -1.72833600 | -0.15693300 |   |             |             |             |
| N                    | 1.59900900  | -1.03994100 | -1.99158600 |   |             |             |             |
| C                    | 2.89523200  | -0.98128600 | -2.34880500 |   |             |             |             |
| H                    | 3.61392900  | -1.28010000 | -1.59738400 |   |             |             |             |
| C                    | 3.29334800  | -0.54942800 | -3.60783400 |   |             |             |             |
| H                    | 4.34815200  | -0.51632400 | -3.85307700 |   |             |             |             |
| C                    | 2.31417100  | -0.16817200 | -4.52622000 |   |             |             |             |
| H                    | 2.58989300  | 0.17148000  | -5.51899300 |   |             |             |             |
| C                    | 0.97579700  | -0.22277400 | -4.15384900 |   |             |             |             |
| H                    | 0.20280100  | 0.07451800  | -4.85125000 |   |             |             |             |
| C                    | 0.62559400  | -0.66187200 | -2.87215200 |   |             |             |             |
| C                    | -0.73475500 | -0.75423700 | -2.34033400 |   |             |             |             |
| C                    | -1.88189100 | -0.41172300 | -3.06736600 |   |             |             |             |
| H                    | -1.80893100 | -0.05898000 | -4.09085000 |   |             |             |             |
| C                    | -3.13924100 | -0.53279700 | -2.48377900 |   |             |             |             |
| H                    | -4.02035400 | -0.28033000 | -3.06708500 |   |             |             |             |
| C                    | -3.28891600 | -0.99027000 | -1.15947000 |   |             |             |             |
| C                    | -2.13920500 | -1.33594700 | -0.44315900 |   |             |             |             |
| H                    | -2.25229800 | -1.70731800 | 0.56992100  |   |             |             |             |
| C                    | -0.85324600 | -1.22267200 | -1.00030300 |   |             |             |             |
| N                    | 0.08688500  | -2.29819800 | 1.67561200  |   |             |             |             |
| C                    | 1.13170800  | -0.02093800 | 0.83382900  |   |             |             |             |
| C                    | -0.35674800 | -3.53272300 | 1.97162900  |   |             |             |             |
| C                    | 0.01450700  | -1.29952800 | 2.60561100  |   |             |             |             |
| C                    | 0.58075800  | -0.02694800 | 2.15765800  |   |             |             |             |
| C                    | 1.73119500  | 1.17242100  | 0.37285100  |   |             |             |             |
| H                    | -0.26027700 | -4.27248900 | 1.18739000  |   |             |             |             |
| C                    | -0.91226900 | -3.83774900 | 3.20892200  |   |             |             |             |
| C                    | -0.54314400 | -1.55386400 | 3.86283900  |   |             |             |             |
| C                    | 0.61620000  | 1.12807600  | 2.94207000  |   |             |             |             |
| C                    | 1.78277800  | 2.32501600  | 1.15543100  |   |             |             |             |
| H                    | 2.16188400  | 1.20073700  | -0.62256400 |   |             |             |             |

|   |             |             |             |  |  |  |
|---|-------------|-------------|-------------|--|--|--|
| H | -1.25785600 | -4.84555300 | 3.40615800  |  |  |  |
| C | -1.01187500 | -2.82836900 | 4.16715800  |  |  |  |
| H | -0.60366000 | -0.75992700 | 4.59693800  |  |  |  |
| H | 0.19729400  | 1.13896400  | 3.94280900  |  |  |  |
| C | 1.21200800  | 2.28579500  | 2.44611200  |  |  |  |
| H | -1.44559800 | -3.03110900 | 5.14058200  |  |  |  |
| H | 1.24774300  | 3.17351700  | 3.07157100  |  |  |  |
| C | 2.42356000  | 3.59920500  | 0.65459400  |  |  |  |
| H | 3.03027900  | 4.03136700  | 1.45858700  |  |  |  |
| H | 3.10321700  | 3.36302100  | -0.17000900 |  |  |  |
| C | 1.39223200  | 4.67289700  | 0.19817500  |  |  |  |
| H | 0.64942700  | 4.75875400  | 1.00018200  |  |  |  |
| C | 2.01131300  | 6.06071600  | 0.02832800  |  |  |  |
| C | 1.18776500  | 7.18883600  | 0.17331200  |  |  |  |
| C | 3.36250200  | 6.26377700  | -0.28411800 |  |  |  |
| C | 1.69411800  | 8.47777500  | 0.00988600  |  |  |  |
| H | 0.13709700  | 7.05136400  | 0.41754200  |  |  |  |
| C | 3.87390000  | 7.55505200  | -0.45012300 |  |  |  |
| H | 4.03246000  | 5.41697300  | -0.39560600 |  |  |  |
| C | 3.04331900  | 8.66633600  | -0.30446300 |  |  |  |
| H | 1.03745600  | 9.33465200  | 0.13193300  |  |  |  |
| H | 4.92498700  | 7.68805300  | -0.69065900 |  |  |  |
| H | 3.44178400  | 9.66883800  | -0.43040600 |  |  |  |
| C | 0.63643100  | 4.23668600  | -1.05732600 |  |  |  |
| C | -0.70971100 | 3.85581600  | -0.97868800 |  |  |  |
| C | 1.26804900  | 4.20139800  | -2.31006900 |  |  |  |
| C | -1.40993600 | 3.45222500  | -2.11916400 |  |  |  |
| H | -1.21811800 | 3.87438200  | -0.01801000 |  |  |  |
| C | 0.57313200  | 3.79737500  | -3.45053400 |  |  |  |
| H | 2.30724900  | 4.50681300  | -2.39802500 |  |  |  |
| C | -0.77096500 | 3.42235600  | -3.35980300 |  |  |  |
| H | -2.45280800 | 3.16117300  | -2.03272900 |  |  |  |
| H | 1.07896700  | 3.78186600  | -4.41191100 |  |  |  |
| H | -1.31394000 | 3.11377200  | -4.24844600 |  |  |  |
| C | -4.66842900 | -1.11769300 | -0.55015000 |  |  |  |
| H | -5.30029100 | -1.71067900 | -1.22169600 |  |  |  |
| H | -4.61188300 | -1.67698600 | 0.38859700  |  |  |  |
| C | -5.39804500 | 0.24003400  | -0.32201900 |  |  |  |
| H | -5.41812900 | 0.74891200  | -1.29235000 |  |  |  |
| C | -6.85864100 | -0.00809100 | 0.06298900  |  |  |  |
| C | -7.86895100 | 0.17266900  | -0.89208000 |  |  |  |
| C | -7.22463600 | -0.45023600 | 1.34300300  |  |  |  |
| C | -9.20737000 | -0.08087800 | -0.58191000 |  |  |  |
| H | -7.60514300 | 0.51652800  | -1.88940400 |  |  |  |

|   |             |             |             |  |  |  |
|---|-------------|-------------|-------------|--|--|--|
| C | -8.56063400 | -0.70676300 | 1.65627700  |  |  |  |
| H | -6.46448200 | -0.58566900 | 2.10661000  |  |  |  |
| C | -9.55814400 | -0.52302500 | 0.69498400  |  |  |  |
| H | -9.97346800 | 0.06985600  | -1.33735100 |  |  |  |
| H | -8.82271900 | -1.04723400 | 2.65419100  |  |  |  |
| H | 10.59774200 | -0.71962500 | 0.94054800  |  |  |  |
| C | -4.68856500 | 1.18360200  | 0.64669300  |  |  |  |
| C | -4.71048600 | 2.56312000  | 0.38880300  |  |  |  |
| C | -4.03903200 | 0.74089400  | 1.80865600  |  |  |  |
| C | -4.10831600 | 3.47251000  | 1.26052200  |  |  |  |
| H | -5.21002100 | 2.92866000  | -0.50523600 |  |  |  |
| C | -3.43471400 | 1.64701700  | 2.68457400  |  |  |  |
| H | -3.99535400 | -0.31842700 | 2.04130700  |  |  |  |
| C | -3.46626000 | 3.01646200  | 2.41500900  |  |  |  |
| H | -4.14167100 | 4.53530900  | 1.03798200  |  |  |  |
| H | -2.93700800 | 1.27815900  | 3.57692600  |  |  |  |
| H | -2.99621000 | 3.72030400  | 3.09553700  |  |  |  |
| C | 1.96686100  | -4.43288600 | -1.18368200 |  |  |  |
| C | 2.04273500  | -5.65613500 | -1.90266300 |  |  |  |
| C | -0.35020700 | -4.32197600 | -1.63562700 |  |  |  |
| C | 0.91460100  | -6.19937500 | -2.46765900 |  |  |  |
| H | 3.00126100  | -6.15957900 | -1.97903400 |  |  |  |
| C | -0.32911300 | -5.51889000 | -2.32125900 |  |  |  |
| H | -1.27471200 | -3.76682800 | -1.51739000 |  |  |  |
| H | 0.96809000  | -7.13799100 | -3.01004500 |  |  |  |
| H | -1.24496800 | -5.91341800 | -2.74559700 |  |  |  |
| N | 0.74992400  | -3.75596500 | -1.08352100 |  |  |  |
| C | 4.46470700  | -4.04816700 | -0.62130400 |  |  |  |
| C | 5.05422900  | -3.06352900 | 0.11361500  |  |  |  |
| H | 4.96735800  | -4.81046700 | -1.19720200 |  |  |  |
| H | 6.09338200  | -2.87332600 | 0.33613700  |  |  |  |
| N | 2.81714100  | -2.76577400 | 0.33091600  |  |  |  |
| N | 4.07015500  | -2.25478700 | 0.66035000  |  |  |  |
| C | 3.05669500  | -3.83228900 | -0.51417700 |  |  |  |
| C | 4.27660500  | -1.42950600 | 1.79453500  |  |  |  |
| C | 3.49752600  | -1.58232300 | 2.94806000  |  |  |  |
| C | 5.31543700  | -0.48735000 | 1.76302300  |  |  |  |
| C | 3.76034900  | -0.78983300 | 4.06507400  |  |  |  |
| H | 2.71495500  | -2.33121700 | 2.96434000  |  |  |  |
| C | 5.57778400  | 0.28689100  | 2.89170200  |  |  |  |
| H | 5.90361500  | -0.36281300 | 0.85927900  |  |  |  |
| C | 4.80003300  | 0.14344000  | 4.04519800  |  |  |  |
| H | 3.15615900  | -0.91361100 | 4.95888600  |  |  |  |
| H | 6.38428500  | 1.01337500  | 2.86423000  |  |  |  |



|   |            |            |            |  |  |  |
|---|------------|------------|------------|--|--|--|
| H | 5.00274200 | 0.75424900 | 4.91936100 |  |  |  |
|---|------------|------------|------------|--|--|--|
